# Supplementary figures and images for: Effect of a facility-based multifaceted intervention on the quality of obstetrical care: a cluster randomized controlled trial in Mali and Senegal
Source: Springer Nature journal article supplement (doi:10.1186/1471-2393-13-24), 2013-01-25

# Hospital in Mali

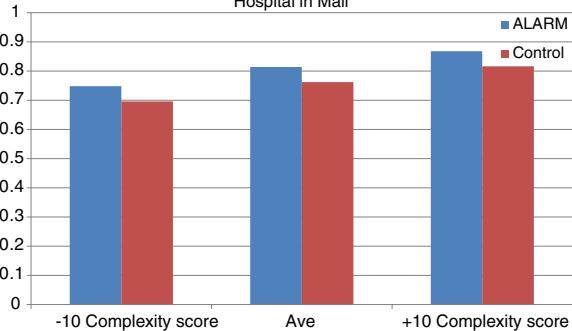

Supplement: 12884_2012_700_MOESM2_ESM.pdf [file 12884_2012_700_MOESM2_ESM.pdf]

# Hospital in Senegal

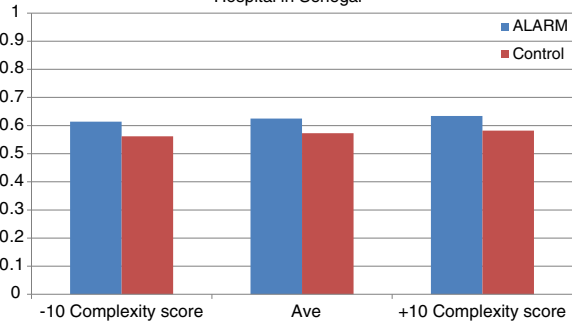

Supplement: 12884_2012_700_MOESM3_ESM.pdf [file 12884_2012_700_MOESM3_ESM.pdf]
